# Supplementary material for: Effects of Ultra-High Pressure on Endogenous Enzyme Activities, Protein Properties, and Quality Characteristics of Shrimp (Litopenaeus vannamei) during Iced Storage
Source: MDPI journal article supplement (doi:10.3390/molecules27196302), 2022-09-24
Supplement: s1 [file s1]

Supplementary Materials

# Effects of Ultra-High Pressure on Endogenous Enzyme Activities, Protein Properties, and Quality Characteristics of Shrimp (*Litopenaeus Vannamei*) during Iced Storage

Chen Zhu <sup>†</sup>, Dexin Jiao <sup>†</sup>, Ying Sun, Lihang Chen, Siyu Meng <sup>1,2</sup>, Xiaona Yu, Mingzhu Zheng, Meihong Liu, Jingsheng Liu and Huimin Liu\*

**Table S1.** The parameters of ultra-high pressure.

| Pressure (MPa) | Come-up Time (s) | Holding Time (s) | Decompression Time (s) | Min Pressure During Holding (MPa) | Max Pressure During Holding (MPa) |
|----------------|------------------|------------------|------------------------|-----------------------------------|-----------------------------------|
| 100            | 13               | 300              | 1                      | 101                               | 107                               |
| 200            | 20               | 300              | 1                      | 197                               | 203                               |
| 300            | 29               | 300              | 2                      | 294                               | 299                               |
| 400            | 34               | 300              | 3                      | 390                               | 402                               |
| 500            | 39               | 300              | 3                      | 491                               | 505                               |

**Table S2.** The corresponding substrates, reaction buffers and stopping solution of cathepsin B, H and L.

| <b>Endogenous enzyme</b> | <b>Cathepsin B</b> | <b>Cathepsin H</b> | <b>Cathepsin L</b> |
|--------------------------|--------------------|--------------------|--------------------|
| corresponding substrates | Z-Arg-Arg-AMC      | L-Arg-AMC          | Z-Phe-Arg-AMC      |
| reaction buffers         | 150 mM Bis-tris    | 150 mM Bis-tris    | 150 mM Bis-tris    |
|                          | 30 mM EDTA         | 30 mM EDTA         | 30 mM EDTA         |
|                          | 6 mmol/L DTT       | 6 mmol/L DTT       | 6 mmol/L DTT       |
| stopping solution        | PH 6.0             | PH 6.8             | PH 5.5             |
|                          | 1% SDS             | 1% SDS             | 1% SDS             |
|                          | 50 mM bis-Tris     | 50 mM bis-Tris     | 50 mM bis-Tris     |
|                          | pH 7.0             | pH 7.0             | pH 7.0             |

**Table S3.** Effects of UHP treatment on textural properties of shrimp during iced storage.

|                 | Pressure treatment | Storage time (days)         |                             |                                       |                                      |                              |                               |
|-----------------|--------------------|-----------------------------|-----------------------------|---------------------------------------|--------------------------------------|------------------------------|-------------------------------|
|                 |                    | 0                           | 3                           | 6                                     | 9                                    | 12                           | 15                            |
| Hardness (N)    | Control            | 244.29±20.28 <sup>Ce</sup>  | 439.32±3.98 <sup>Da</sup>   | 411.38±7.44 <sup>Dab</sup>            | 384.35±5.59 <sup>Db</sup>            | 334.26±4.3 <sup>Dc</sup>     | 275.85±6.71 <sup>Dd</sup>     |
|                 | 100 MPa            | 272.41±10.09 <sup>Ce</sup>  | 512.42±1.04 <sup>Ca</sup>   | 486.91±12.45 <sup>Ca</sup>            | 431.08±16.32 <sup>Cb</sup>           | 332.89±7.57 <sup>Dc</sup>    | 301.22±8.69 <sup>Dd</sup>     |
|                 | 200 MPa            | 301.02±21.17 <sup>Be</sup>  | 544.41±3.28 <sup>Ba</sup>   | 493.5±2.59 <sup>Cb</sup>              | 457.38±11.95 <sup>Cc</sup>           | 363.61±6.7 <sup>Cd</sup>     | 335.1±6.53 <sup>Cd</sup>      |
|                 | 300 MPa            | 314.08±12.74 <sup>Be</sup>  | 561.33±1.85 <sup>Ba</sup>   | 531.84±8.66 <sup>Bb</sup>             | 492.16±9.21 <sup>Bc</sup>            | 418.83±9.33 <sup>Bd</sup>    | 402.9±2.06 <sup>Bd</sup>      |
|                 | 400 MPa            | 317.98±9.36 <sup>Be</sup>   | 540.88±30.44 <sup>BCa</sup> | 500.81±6.29 <sup>Cb</sup>             | 434.3±11.03 <sup>Cc</sup>            | 378.67±8.85 <sup>Cd</sup>    | 334.87±8.42 <sup>Ce</sup>     |
|                 | 500 MPa            | 482.56±17.29 <sup>Af</sup>  | 738.01±18.71 <sup>Aa</sup>  | 706.97±7.53 <sup>Ab</sup>             | 627.77±8.37 <sup>Ac</sup>            | 576.2±17.43 <sup>Ad</sup>    | 527.47±19.63 <sup>Ae</sup>    |
| Springiness     | Control            | 0.5±0.02 <sup>ABa</sup>     | 0.47±0.06 <sup>Ba</sup>     | 0.43±0.07 <sup>Bb</sup>               | 0.57±0.01 <sup>Aa</sup>              | 0.48±0.11 <sup>Aa</sup>      | 0.45±0.07 <sup>Ba</sup>       |
|                 | 100 MPa            | 0.47±0.04 <sup>ABa</sup>    | 0.53±0.09 <sup>Ba</sup>     | 0.51±0.06 <sup>ABa</sup>              | 0.56±0.02 <sup>Aa</sup>              | 0.46±0.02 <sup>Aa</sup>      | 0.45±0.08 <sup>Ba</sup>       |
|                 | 200 MPa            | 0.44±0.01 <sup>Ba</sup>     | 0.49±0.05 <sup>Ba</sup>     | 0.56±0.05 <sup>Aa</sup>               | 0.51±0.05 <sup>Aa</sup>              | 0.56±0.06 <sup>Aa</sup>      | 0.5±0.03 <sup>ABa</sup>       |
|                 | 300 MPa            | 0.59±0.01 <sup>Aa</sup>     | 0.53±0.03 <sup>Ba</sup>     | 0.55±0.03 <sup>ABa</sup>              | 0.56±0.06 <sup>Aa</sup>              | 0.57±0.05 <sup>Aa</sup>      | 0.48±0.01 <sup>ABa</sup>      |
|                 | 400 MPa            | 0.52±0.05 <sup>ABa</sup>    | 0.53±0.03 <sup>Ba</sup>     | 0.61±0.05 <sup>Aa</sup>               | 0.55±0.06 <sup>Aa</sup>              | 0.54±0.05 <sup>Aa</sup>      | 0.56±0.05 <sup>ABa</sup>      |
|                 | 500 MPa            | 0.57±0.04 <sup>ABcd</sup>   | 0.7±0.08 <sup>Aa</sup>      | 0.54±0.04 <sup>ABd</sup>              | 0.59±0.03 <sup>Aabcd</sup>           | 0.55±0.03 <sup>Ac</sup>      | 0.59±0.04 <sup>Aabcd</sup>    |
| Gumminess       | Control            | 106.23±37.7 <sup>Bc</sup>   | 191.11±7.72 <sup>Ba</sup>   | 174.34±18 <sup>Cab</sup>              | 141.51±36.99 <sup>Dabc</sup>         | 137.34±14.59 <sup>Babc</sup> | 119.02±12.31 <sup>Dbc</sup>   |
|                 | 100 MPa            | 103.03±33 <sup>Bd</sup>     | 234.34±28.49 <sup>Ba</sup>  | 210.91±13.14 <sup>BCab</sup>          | 166.63±19.77 <sup>CDbc</sup>         | 155.6±24.65 <sup>Bbcd</sup>  | 133.88±5.16 <sup>CDcd</sup>   |
|                 | 200 MPa            | 109.01±26.7 <sup>Be</sup>   | 255.57±12.97 <sup>Ba</sup>  | 206.75±5.66 <sup>BCab</sup>           | 195.55±37.81 <sup>BCDbc</sup>        | 133.68±15.2 <sup>Bde</sup>   | 139.71±14.34 <sup>CDede</sup> |
|                 | 300 MPa            | 149.44±31.64 <sup>Bc</sup>  | 248.96±41.66 <sup>Ba</sup>  | 236.55±35.79 <sup>Ba</sup>            | 232.5±26.7 <sup>Bab</sup>            | 180.18±4.28 <sup>Bbc</sup>   | 199.72±12.5 <sup>Babc</sup>   |
|                 | 400 MPa            | 149.12±7.43 <sup>Bd</sup>   | 265.5±19.45 <sup>Ba</sup>   | 264.8±19.04 <sup>Ba</sup>             | 208.45±22.9 <sup>BCbc</sup>          | 186.29±9.88 <sup>Bbcd</sup>  | 166.53±18.42 <sup>BCDcd</sup> |
|                 | 500 MPa            | 216.85±8.62 <sup>Ad</sup>   | 446.49±24.71 <sup>Aa</sup>  | 409.58±18.73 <sup>Aa</sup>            | 341.91±25.5 <sup>Ab</sup>            | 270.16±43.44 <sup>Ac</sup>   | 270.81±17.7 <sup>Ac</sup>     |
| Chewiness       | Control            | 46.99±8.95 <sup>Bc</sup>    | 90.25±9.4 <sup>Ca</sup>     | 74.89±9.1 <sup>Dabc</sup>             | 75.43±8.02 <sup>Cabc</sup>           | 66.96±20.78 <sup>Cabc</sup>  | 53.61±3.9 <sup>Dbc</sup>      |
|                 | 100 MPa            | 49.24±16.85 <sup>Bd</sup>   | 114.41±9.69 <sup>BCa</sup>  | 107.6±10.65 <sup>CDa</sup>            | 92.95±14.87 <sup>BCab</sup>          | 71.03±13.4 <sup>BCbcd</sup>  | 59.89±13.4 <sup>CDcd</sup>    |
|                 | 200 MPa            | 48.24±12.81 <sup>Bd</sup>   | 123.58±6.29 <sup>Ba</sup>   | 114.74±10.76 <sup>Ca</sup>            | 100.87±26.86 <sup>BCabc</sup>        | 74.4±1.68 <sup>BCbcd</sup>   | 69.89±7.74 <sup>BCDcd</sup>   |
|                 | 300 MPa            | 76.87±4.51 <sup>Bc</sup>    | 131.87±18.66 <sup>Ba</sup>  | 129.44±18.73 <sup>Ca</sup>            | 124.04±18.01 <sup>Bab</sup>          | 101.87±10.73 <sup>Babc</sup> | 95.38±5.17 <sup>Bbc</sup>     |
|                 | 400 MPa            | 77±6.52 <sup>Be</sup>       | 141.02±11.52 <sup>Bab</sup> | 162.39±15.44 <sup>Ba</sup>            | 113.59±1.28 <sup>Bbcd</sup>          | 99.92±9.16 <sup>BCde</sup>   | 93.54±9.32 <sup>Bde</sup>     |
|                 | 500 MPa            | 122.45±5.59 <sup>Ae</sup>   | 237.13±18.78 <sup>Aa</sup>  | 221.84±11.52 <sup>Ab</sup>            | 200.04±11.98 <sup>Ab</sup>           | 149.68±31.52 <sup>Ad</sup>   | 160.2±19.95 <sup>Ac</sup>     |
| Shear force (N) | Control            | 10.45±1.18 <sup>Ea</sup>    | 10.45±1.18 <sup>Ea</sup>    | 11.25±1.13 <sup>Da</sup>              | 10.45±1.18 <sup>Ea</sup>             | 9.79±0.84 <sup>Dc</sup>      | 9.57±1.34 <sup>Ea</sup>       |
|                 | 100 MPa            | 13.16±1.22 <sup>Da</sup>    | 13.16±1.22 <sup>Da</sup>    | 12.95±0.22 <sup>CDa</sup>             | 13.16±1.22 <sup>Da</sup>             | 11.19±0.38 <sup>Dc</sup>     | 13.16±1.22 <sup>Da</sup>      |
|                 | 200 MPa            | 14.51±0.19 <sup>CDa</sup>   | 14.51±0.19 <sup>CDa</sup>   | 13.45±0.18 <sup>Ca</sup>              | 14.51±0.19 <sup>CDa</sup>            | 13.41±0.53 <sup>Cd</sup>     | 14.48±0.15 <sup>CDa</sup>     |
|                 | 300 MPa            | 15.84±0.83 <sup>BCa</sup>   | 15.51±0.47 <sup>BCa</sup>   | 14.59±0.41 <sup>BCa</sup>             | 15.51±0.47 <sup>B<sup>C</sup>a</sup> | 14.91±0.23 <sup>Bd</sup>     | 15.2±0.61 <sup>BCa</sup>      |
|                 | 400 MPa            | 17.81±0.94 <sup>Ba</sup>    | 17.11±0.6 <sup>Ba</sup>     | 15.81±0.32 <sup>Bb</sup>              | 17.11±0.6 <sup>Ba</sup>              | 16.27±1.73 <sup>Cd</sup>     | 16.84±0.17 <sup>Aba</sup>     |
|                 | 500 MPa            | 20.34±1.09 <sup>ABcd</sup>  | 22.23±0.72 <sup>Aab</sup>   | 20.48±0.61 <sup>Abc</sup>             | 23.66±1.25 <sup>Aa</sup>             | 19.04±0.26 <sup>Ad</sup>     | 18.36±0.51 <sup>Ad</sup>      |
| Adhesiveness    | Control            | -13.92±3.11 <sup>ABab</sup> | -11.72±1.07 <sup>Aa</sup>   | -11.15±2.86 <sup>ABa</sup>            | -19.66±2.11 <sup>BCb</sup>           | -19.16±1.95 <sup>Bb</sup>    | -13.81±3.21 <sup>ABab</sup>   |
|                 | 100 MPa            | -12.76±2.9 <sup>ABa</sup>   | -13.25±2.69 <sup>ABa</sup>  | -9.82±2.44 <sup>Aa</sup>              | -21.4±0.17 <sup>Cb</sup>             | -12.04±3.84 <sup>Aa</sup>    | -13.58±2.92 <sup>ABa</sup>    |
|                 | 200 MPa            | -10.87±0.67 <sup>Aa</sup>   | -8.98±0.97 <sup>Aa</sup>    | -13.91±2.98 <sup>ABa</sup>            | -14.44±3.08 <sup>ABa</sup>           | -12.98±2.72 <sup>ABa</sup>   | -15.44±3.94 <sup>ABa</sup>    |
|                 | 300 MPa            | -14.85±3.09 <sup>ABa</sup>  | -9.49±4.76 <sup>Aa</sup>    | -11.94±2.36 <sup>A<sup>B</sup>a</sup> | -9.82±4.38 <sup>Aa</sup>             | -14.71±4.14 <sup>ABa</sup>   | -13.14±0.77 <sup>Aa</sup>     |
|                 | 400 MPa            | -18.09±4.18 <sup>Bb</sup>   | -10.84±2.04 <sup>Aa</sup>   | -16.82±0.95 <sup>Bab</sup>            | -12.03±4.63 <sup>Aab</sup>           | -15.39±1.62 <sup>ABab</sup>  | -15.22±0.75 <sup>ABab</sup>   |
|                 | 500 MPa            | -8.2±1.62 <sup>Aa</sup>     | -19.15±3.03 <sup>Bc</sup>   | -7.54±1.93 <sup>Aa</sup>              | -10.36±3.32 <sup>Aab</sup>           | -15.61±1.21 <sup>ABbc</sup>  | -19.92±2.8 <sup>Bc</sup>      |
| Cohesiveness    | Control            | 0.4±0.07 <sup>ABa</sup>     | 0.44±0.02 <sup>Aa</sup>     | 0.42±0.04 <sup>Ba</sup>               | 0.37±0.09 <sup>Ca</sup>              | 0.41±0.04 <sup>ABa</sup>     | 0.43±0.04 <sup>Aa</sup>       |
|                 | 100 MPa            | 0.48±0.05 <sup>Aa</sup>     | 0.49±0.01 <sup>Aa</sup>     | 0.43±0.02 <sup>Ba</sup>               | 0.39±0.03 <sup>Ca</sup>              | 0.47±0.08 <sup>ABa</sup>     | 0.45±0.03 <sup>Aa</sup>       |
|                 | 200 MPa            | 0.36±0.07 <sup>Ba</sup>     | 0.47±0.02 <sup>Aa</sup>     | 0.42±0.01 <sup>Ba</sup>               | 0.43±0.08 <sup>BCa</sup>             | 0.37±0.05 <sup>Ba</sup>      | 0.42±0.05 <sup>Aa</sup>       |
|                 | 300 MPa            | 0.45±0.06 <sup>ABa</sup>    | 0.44±0.08 <sup>Aa</sup>     | 0.44±0.06 <sup>Ba</sup>               | 0.54±0.06 <sup>ABa</sup>             | 0.43±0.02 <sup>ABa</sup>     | 0.5±0.03 <sup>Aa</sup>        |
|                 | 400 MPa            | 0.47±0.01 <sup>ABa</sup>    | 0.49±0.02 <sup>Aa</sup>     | 0.53±0.03 <sup>ABa</sup>              | 0.48±0.06 <sup>ABCa</sup>            | 0.49±0.04 <sup>Aa</sup>      | 0.5±0.04 <sup>Aa</sup>        |
|                 | 500 MPa            | 0.45±0.03 <sup>ABb</sup>    | 0.51±0.04 <sup>Aab</sup>    | 0.58±0.02 <sup>Aa</sup>               | 0.54±0.04 <sup>Aab</sup>             | 0.47±0.08 <sup>ABab</sup>    | 0.51±0.01 <sup>Aab</sup>      |
| Resilience      | Control            | 0.18±0.02 <sup>Cb</sup>     | 0.25±0.02 <sup>Ba</sup>     | 0.25±0.03 <sup>Ba</sup>               | 0.24±0.02 <sup>BCab</sup>            | 0.22±0.01 <sup>Bab</sup>     | 0.23±0.03 <sup>Bab</sup>      |
|                 | 100 MPa            | 0.21±0.02 <sup>BCb</sup>    | 0.26±0.03 <sup>Bab</sup>    | 0.27±0.03 <sup>Ba</sup>               | 0.22±0.01 <sup>Cab</sup>             | 0.25±0.04 <sup>ABab</sup>    | 0.24±0.01 <sup>ABab</sup>     |
|                 | 200 MPa            | 0.23±0.02 <sup>BCb</sup>    | 0.3±0.01 <sup>ABa</sup>     | 0.26±0.01 <sup>Bab</sup>              | 0.28±0.04 <sup>ABCab</sup>           | 0.24±0.01 <sup>ABab</sup>    | 0.24±0.03 <sup>ABab</sup>     |

|         |                       |                       |                        |                        |                        |                        |
|---------|-----------------------|-----------------------|------------------------|------------------------|------------------------|------------------------|
| 300 MPa | $0.21 \pm 0.01^{BCb}$ | $0.29 \pm 0.05^{ABa}$ | $0.28 \pm 0.04^{ABa}$  | $0.3 \pm 0.01^{Aa}$    | $0.26 \pm 0.01^{ABab}$ | $0.28 \pm 0.02^{ABa}$  |
| 400 MPa | $0.25 \pm 0.02^{ABb}$ | $0.3 \pm 0.01^{ABa}$  | $0.29 \pm 0.02^{ABab}$ | $0.29 \pm 0.02^{ABab}$ | $0.27 \pm 0.02^{ABab}$ | $0.25 \pm 0.05^{ABab}$ |
| 500 MPa | $0.29 \pm 0.02^{Aab}$ | $0.34 \pm 0.04^{Ab}$  | $0.33 \pm 0.02^{Aab}$  | $0.32 \pm 0.03^{Aab}$  | $0.28 \pm 0.01^{Ab}$   | $0.29 \pm 0.01^{Aab}$  |

Values are expressed as mean  $\pm$  standard deviation (SD) (n = 3). Different capital letters in the same column indicate significantly different ( $p < 0.05$ ). Different small letters in the same row indicate significantly different ( $p < 0.05$ ).

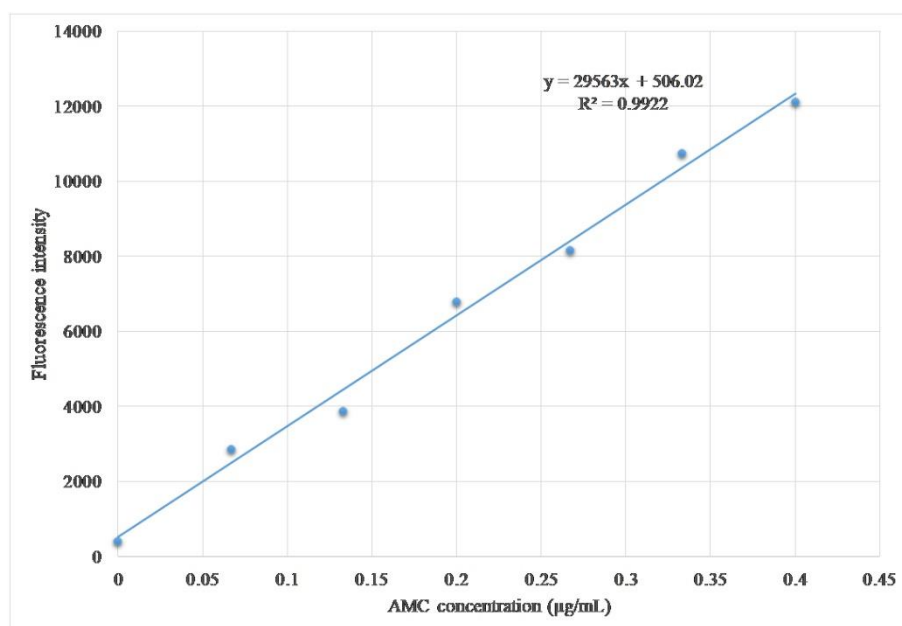

**Figure S1.** The standard curve of AMC.
